# Supplementary material for: Mariner Transposons Contain a Silencer: Possible Role of the Polycomb Repressive Complex 2
Source: PubMed Central journal article supplement (PMC4777549; doi:10.1371/journal.pgen.1005902), 2016-03-03
Supplement: pgen.1005902.s013.pdf [file pgen.1005902.s013.pdf]

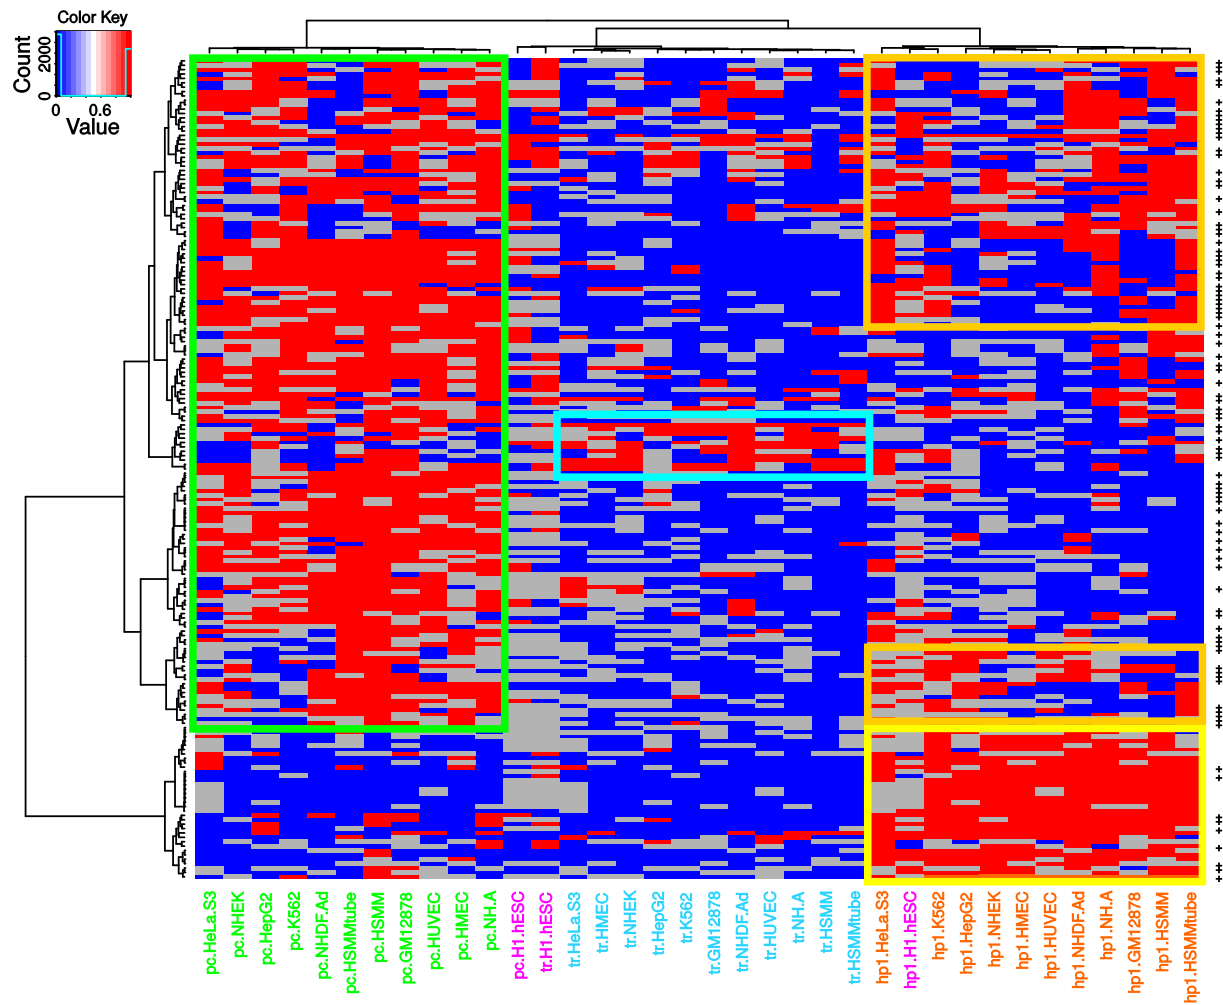

Figure S13
